# Supplementary material
Source: PubMed Central journal article supplement (PMC6414369)
Supplement: AEM.02696-18-s0001.pdf [file AEM.02696-18-s0001.pdf]

## Supplemental Material

Article title: Host specificity patterns of genus *Bacteroides* human fecal markers across 16S ribosomal RNA gene variable regions and development of qPCR assays targeting a sewage-derived *Bacteroides*

Shuchen Feng and Sandra L. McLellan\*

School of Freshwater Sciences, University of Wisconsin-Milwaukee, 600 E. Greenfield Ave, Milwaukee, Wisconsin 53204

\*Corresponding author address: 600 E. Greenfield Ave, Milwaukee, Wisconsin 53204; E-mail: mclellan@uwm.edu; Tel: 414-382-1710

### List of Contents

Fig. S1. Alignment of established 16S rRNA gene *Bacteroides* assays.

Fig. S2. *Bacteroides* oligotypes hierarchical cluster analysis based on Bray-Curits dissimilarity.

Fig. S3. Host specificity of main types of the HF183 downstream regions (V4V5-4 and V6-4).

Fig. S4. Comparison of V4V5 and V6 regions for human-associated *Bacteroides* markers identification.

Fig. S5. Maximum likelihood tree constructed from *Bacteroides* reference strains and clones that are found to contain V4V5 and V6 regions marker candidates.

Fig. S6. Comparison of the four *Bacteroides* assays in environmental water samples.

Table S1. Established *Bacteroides* marker assays, their reported animal cross-reactions and specificities.

Table S2. The V4V5 marker candidates, as well as the specificity and sensitivity, from the permutation test and the NGS dataset.

Table S3. The V6 marker candidates, as well as the specificity and sensitivity, from the permutation test and the NGS dataset.

Table S4. Amplicon sequences of the BacV4V5-1 and BacV6-21 assays.

Table S5. Slopes, y intercepts,  $R^2$  and efficiencies of the four qPCR assays used in this study.

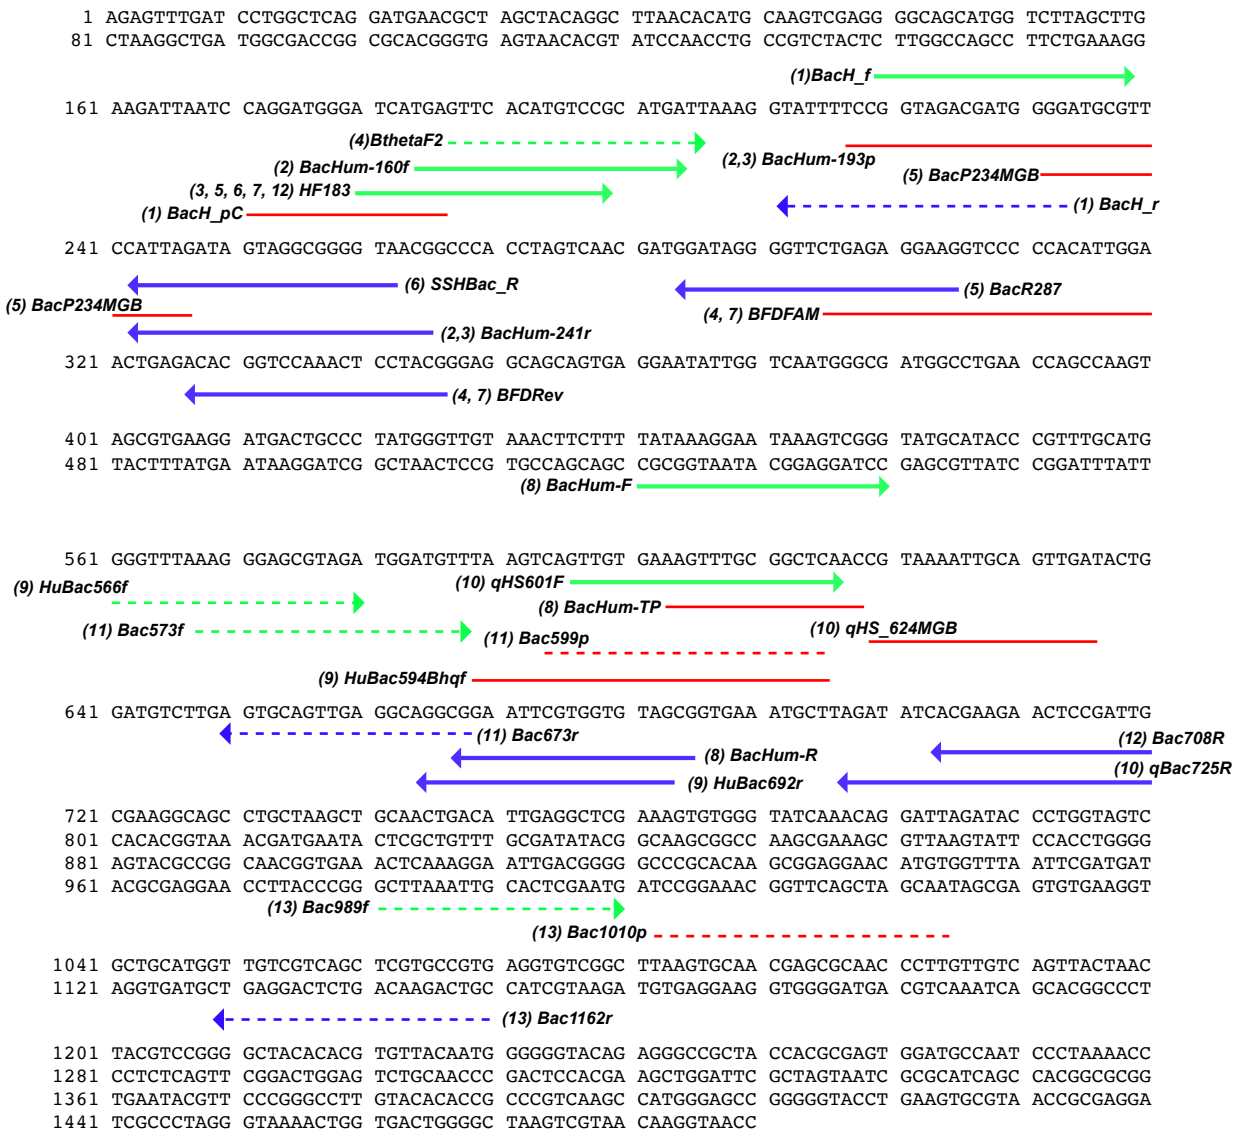

Fig. S1. Alignment of established 16S rRNA gene *Bacteroides* assays. Primers and probes sequences are aligned to reference sequence (GenBank accession number AB242143). Forward primers are shown in green arrows, probes are shown in red lines, and reverse primers are shown in blue arrows. Sequences that are not 100% matched with the reference are shown in dashed line. Each primer/probe name is labeled at the start or end of the sequence. Numbers in parentheses represent the following assays: (1) *BacH* (Reischer et al. 2006), (2) *BacHum*-UCD (Kildare et al. 2007), (3) *HB* (Templar et al. 2016), (4) *BthetaF2* (Haugland et al. 2010), (5) *HF183*/*BacR287* (Green et al. 2014), (6) *HF183*/*SSHBac\_R* (Seurinck et al. 2005), (7) *HF183*/*BFDrev* (Haugland et al. 2010), (8) *BacHuman* (Lee et al. 2010), (9) *HuBac* (Layton et al. 2006), (10) *HumanBac-1* (Okabe et al. 2007), (11) *BacV4V5-1*, developed by this study, (12) *HF183*/*Bac708R* (Bernhard and Field 2000), (13) *BacV6-21*, developed by this study.

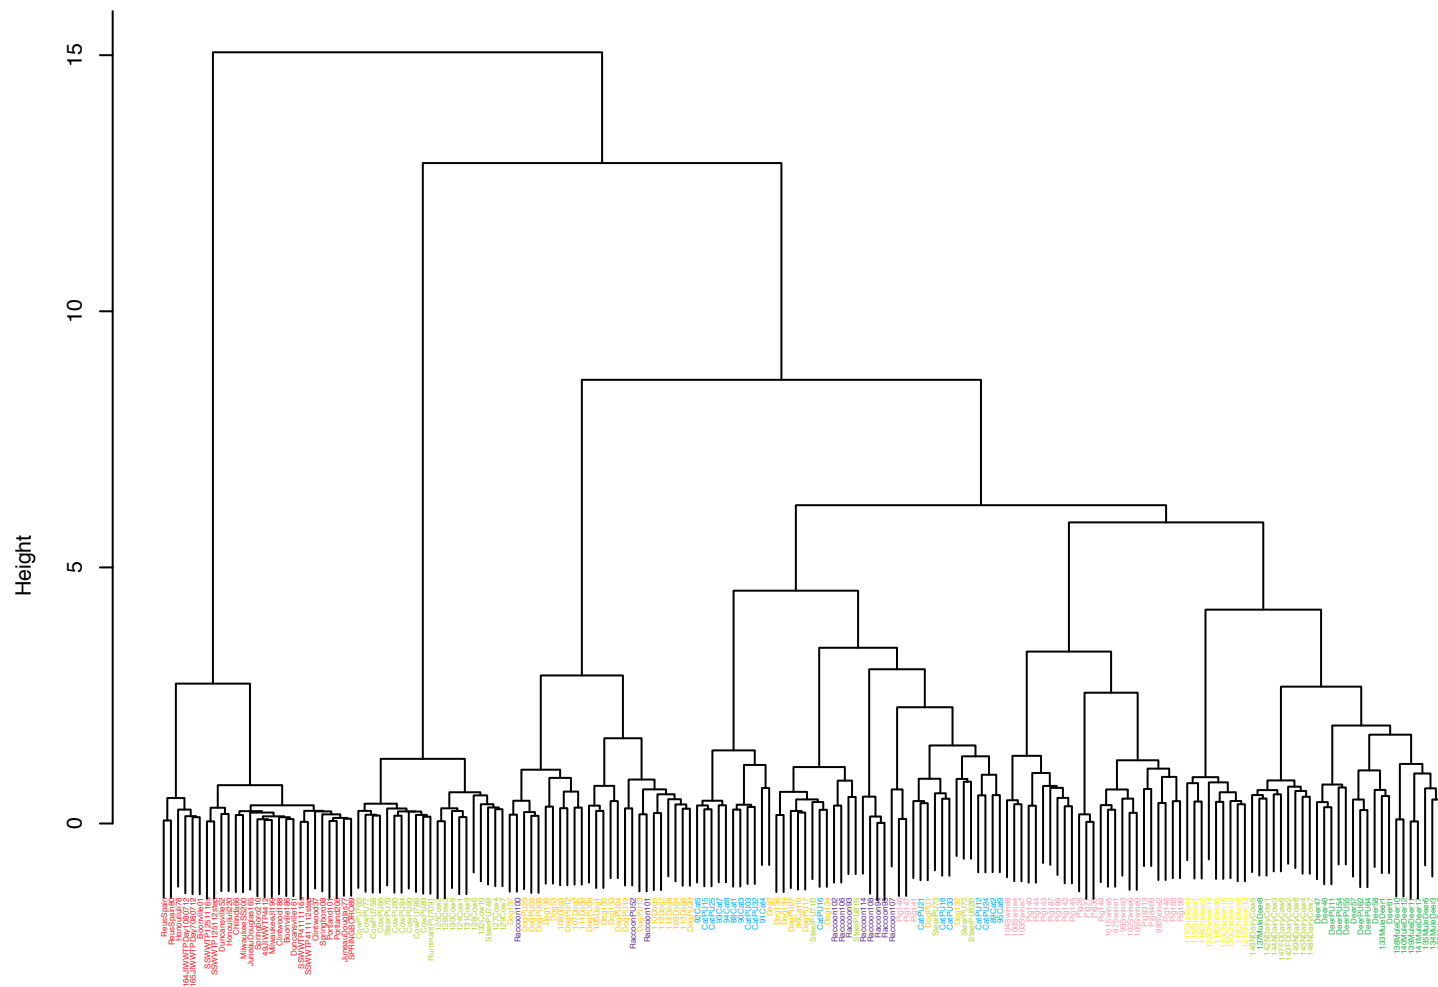

Fig. S2. *Bacteroides* oligotypes hierarchical cluster analysis based on Bray-Curtis dissimilarity. Sewage samples are labeled in red. For animal host labels (left to right): cow samples = light green, dog samples = yellow, raccoon samples = purple, cat samples = blue, pig samples = pink, chicken samples = bright yellow, and deer samples = green.

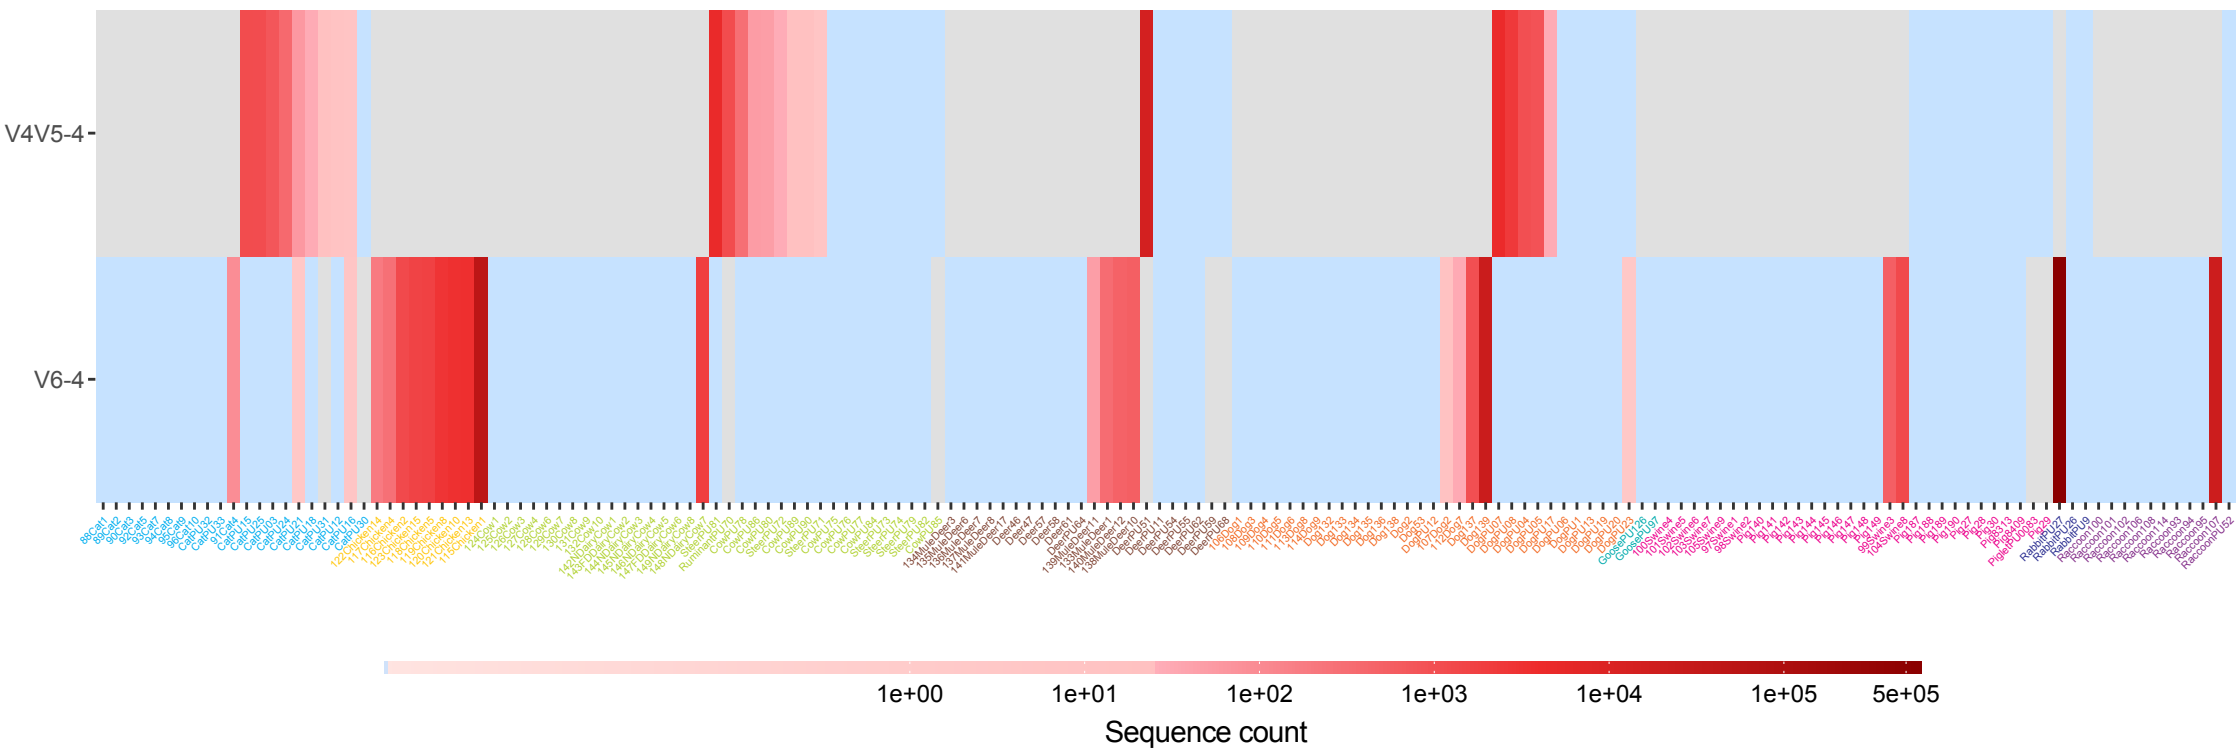

Fig. S3. Host specificity of main types of the HF183 downstream regions (V4V5-4 and V6-4). Gray color = samples are not sequenced. Light blue color = zero sequence count. Positive sequence count values increase from light to dark red. All animals are grouped in host types and labeled in colors as listed below (from left to right): cat samples = blue, chicken samples = yellow, cow samples = light green, deer samples = brown, dog samples = orange, goose samples = green, pig samples = pink, rabbit samples = dark blue, and raccoon samples = purple.

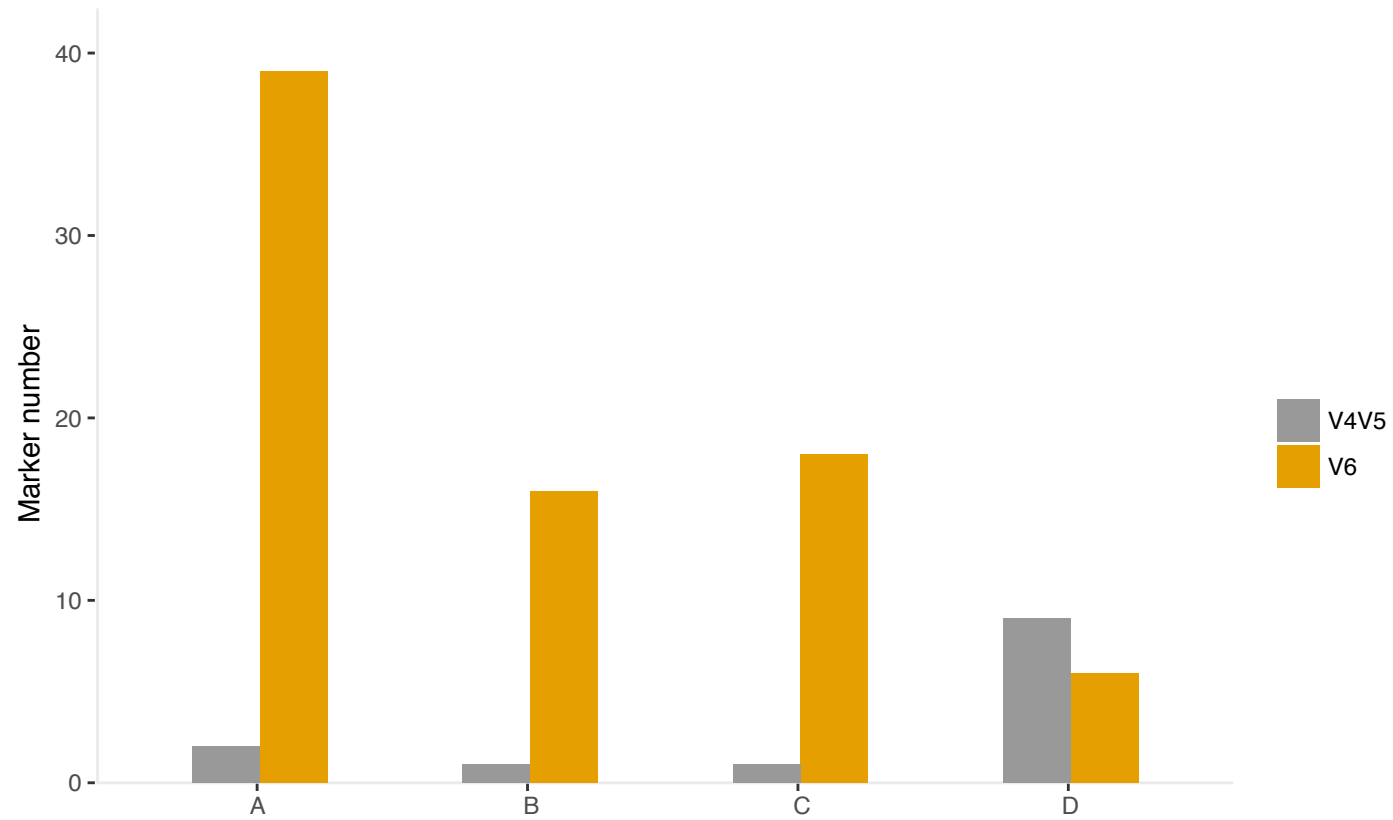

Fig. S4. Comparison of V4V5 and V6 regions for human-associated *Bacteroides* markers identification. Groups of (A) 100% specificity and sensitivity, (B) 100% specificity but 90% ~100% sensitivity, (C) 100% sensitivity but 90% ~100% specificity, and (D) 90% ~100% specificity and sensitivity are shown. Yellow bars represent V6 region marker numbers and grey bars represent V4V5 region marker numbers.

Tree scale: 0.01

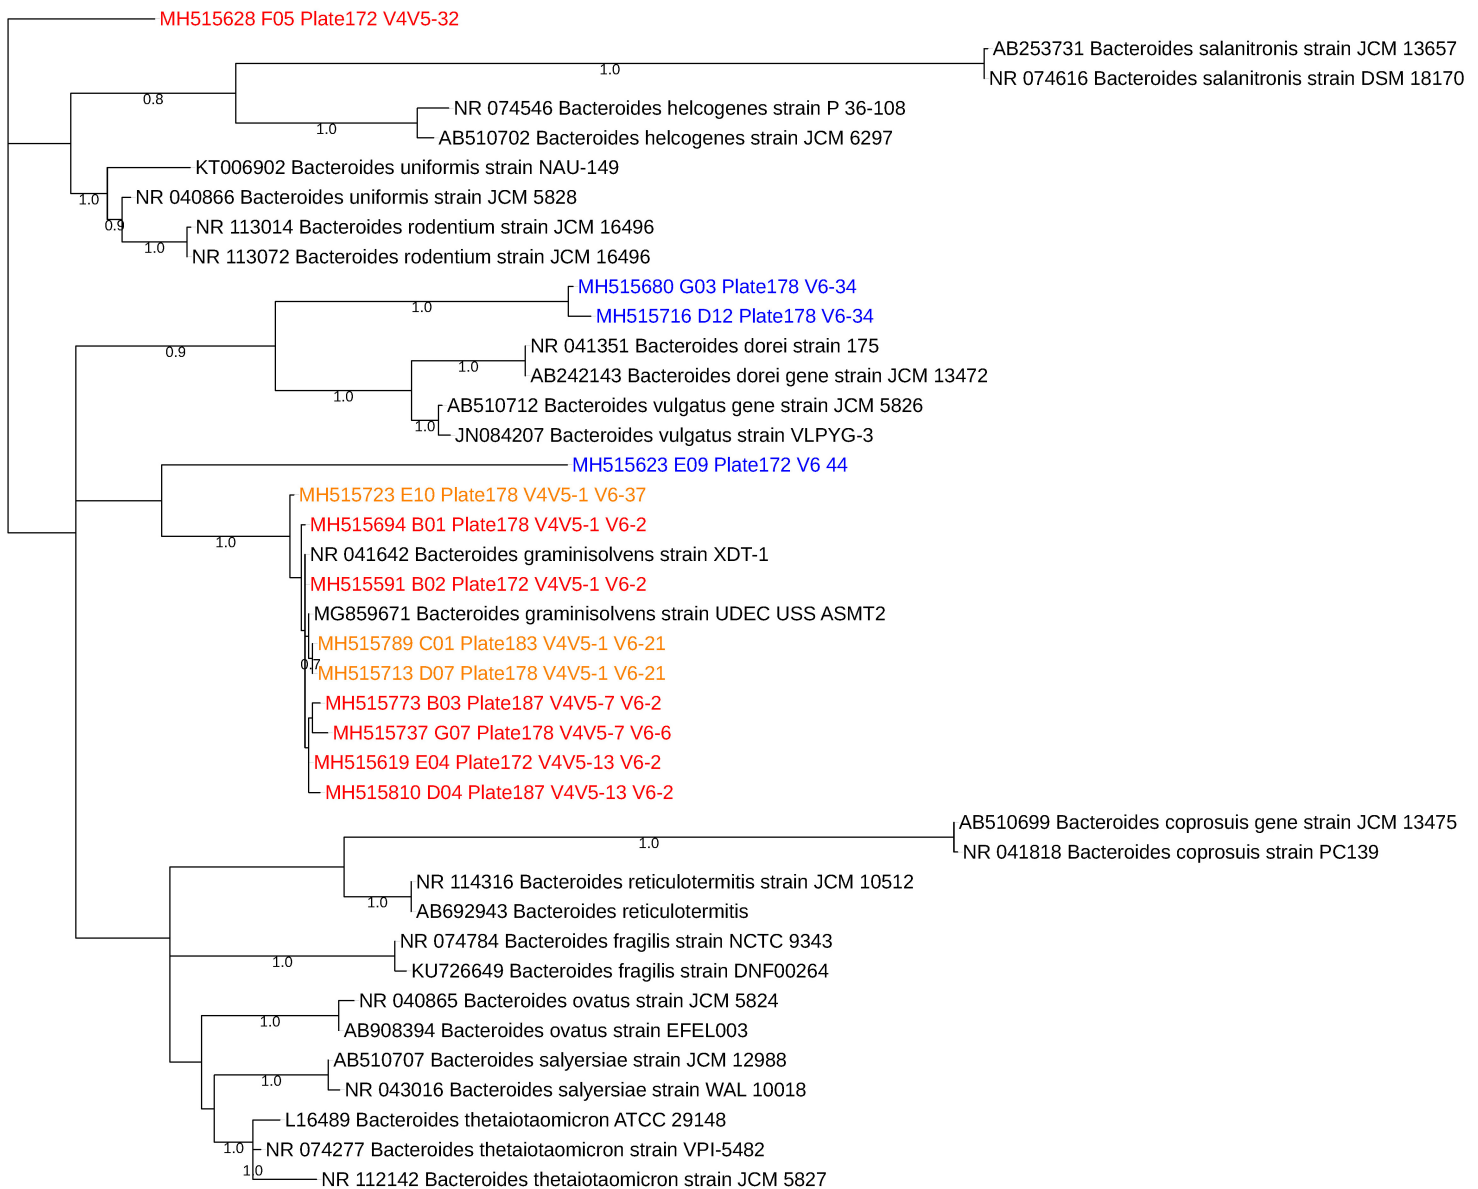

Fig. S5. Maximum likelihood tree constructed from *Bacteroides* reference strains and clones that are found to contain V4V5 and V6 regions marker candidates. The clones contain only the specific V4V5 region marker candidates are labeled in red, only the specific V6 region marker candidates are in blue, and these have both specific marker regions are in orange. Bootstrap values between 0.7 to 1 are shown in the middle position of corresponding branches.

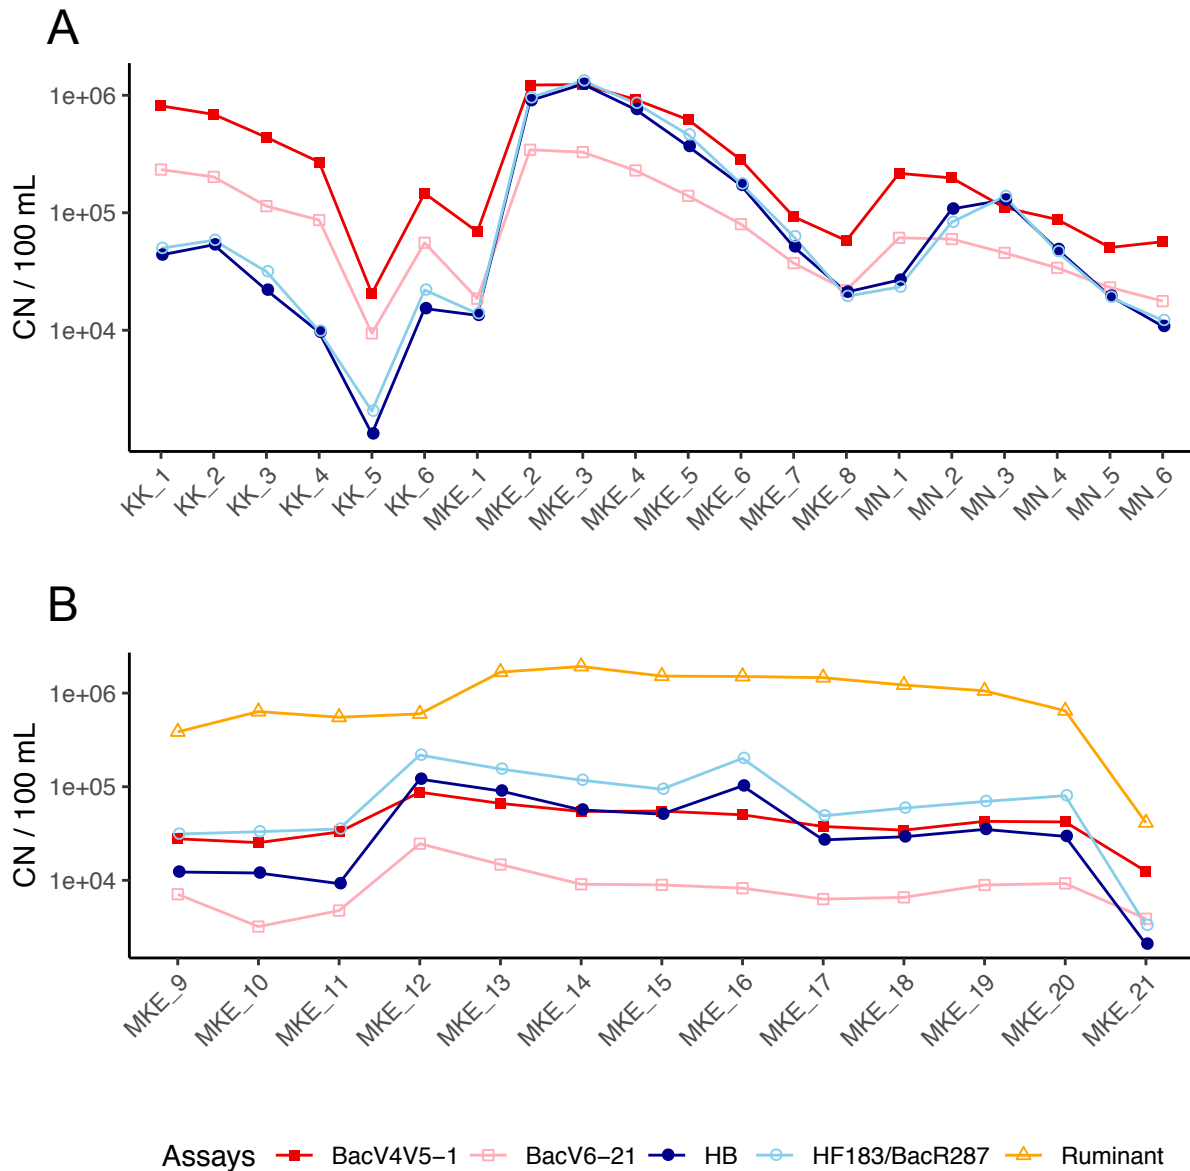

Fig. S6. Comparison of the four *Bacteroides* assays in environmental water samples. A shows comparison of the BacV4V5-1, BacV6-21, HB and HF183/BacR287 assays in sewage-contaminated water samples from Kinnickinnic River (KK), Milwaukee River (MKE) and Menomonee River (MN) from a 2016 combined sewer overflow (CSO) event. B shows comparison of the four *Bacteroides* assays and one ruminant marker assay in agricultural-contaminated MKE river water samples from rain and post-CSO events.

Table S1. Established *Bacteroides* marker assays, their reported animal cross-reactions and specificities. References in bold are the assay developers.

| Target                         | Marker assays               | Type        | Tested animals                                                                                                                                                                                                                          | Positive animals        | Specificity <sup>a</sup>    | Reference                          |
|--------------------------------|-----------------------------|-------------|-----------------------------------------------------------------------------------------------------------------------------------------------------------------------------------------------------------------------------------------|-------------------------|-----------------------------|------------------------------------|
| 16S rRNA gene/ <i>B. dorei</i> | HF183/Bac708R               | PCR         | Cow, cat, deer, dog, duck, elk, goat, llama, pig, seagull, sheep (n= 46)                                                                                                                                                                | None                    | 100.0%                      | <b>Bernhard and Field 2000</b> (1) |
|                                |                             | SYBR qPCR   | Cow, pig, sheep, goat, horse, chicken, dog, duck, pelican, kangaroo (n=136)                                                                                                                                                             | Sheep                   | 99.3%                       | Ahmed et al. 2009 (2)              |
|                                |                             | PCR         | Pronghorn, moose, deer, duck, pelican, raccoon, gull, elk, cattle, goat, pig, turkey, sheep, chicken, dog, cat, dog and 3 marine animals (animals were tested as 22 pools of composite DNA for qPCR and as individuals for PCR) (n=158) | Dog                     | 99.4%                       | Shanks et al. 2010 (3)             |
|                                | HF183/SSHBac-R <sup>b</sup> | SYBR qPCR   | Chicken, horse, cow, dog and pig (n=19)                                                                                                                                                                                                 | Chicken                 | 94.7% <sup>c</sup>          | <b>Seurinck et al. 2005</b> (4)    |
|                                |                             | SYBR qPCR   | Cow, horse, dog, cat and seagull (n=41)                                                                                                                                                                                                 | Dog and cat             | 92.7%                       | Kildare et al. 2007 (5)            |
|                                |                             | SYBR qPCR   | Cows, cat, dog and chicken (n=30)                                                                                                                                                                                                       | Cat and dog             | 93.3%                       | Ahmed et al. 2010 (6)              |
|                                |                             | SYBR qPCR   | Cat, dog, gull, rat and raccoon (n=47)                                                                                                                                                                                                  | Cat                     | 97.2%                       | Van De Werfhorst et al. 2011 (7)   |
|                                |                             | SYBR qPCR   | Monkey, wild boar, bird, chicken, rabbit, cat and dog (n=220)                                                                                                                                                                           | Chicken, rabbit and dog | 88.6%<br>80.0% <sup>d</sup> | Nshimiyimana et al. 2017 (8)       |
|                                | HF183/BFDrev                | TaqMan qPCR | Cow, pig, chicken, dog, cat (each animal as one group of composite DNA) (n=50)                                                                                                                                                          | Chicken and dog         | 60.0%                       | <b>Haugland et al. 2010</b> (9)    |
|                                |                             | TaqMan qPCR | Chicken, turkey, dog, cat, deer, pronghorn, pig and cow (n=123)                                                                                                                                                                         | Chicken and turkey      | 93.5%                       | Green et al. 2014 (10)             |
|                                | HF183/BacR287               | TaqMan qPCR | As described above                                                                                                                                                                                                                      | Chicken and turkey      | 93.5%                       | <b>Green et al. 2014</b> (10)      |
|                                |                             | TaqMan qPCR | As described above                                                                                                                                                                                                                      | Chicken and rabbit      | 90.0%<br>86.7% <sup>d</sup> | Nshimiyimana et al. 2017 (8)       |



|               |                |             |                                                                                                                            |                                                                                              |                             |                                                          |
|---------------|----------------|-------------|----------------------------------------------------------------------------------------------------------------------------|----------------------------------------------------------------------------------------------|-----------------------------|----------------------------------------------------------|
|               |                | TaqMan qPCR | Cat, dog, pig, cow, deer and gull (n=55)                                                                                   | Deer                                                                                         | 94.5%                       | Feng et al. 2018 (11)                                    |
|               | HB             | TaqMan qPCR | As described above                                                                                                         | Deer and dog                                                                                 | 90.9%                       | <b>Templar et al. 2016 (12)</b><br>Feng et al. 2018 (11) |
|               | HF183/BthetaF2 | TaqMan qPCR | As described above                                                                                                         | Chicken and dog                                                                              | 90.9%                       | Shanks et al. 2010 (3)                                   |
| 16S rRNA gene | BacHum-UCD     | TaqMan qPCR | As described above                                                                                                         | Dog                                                                                          | 97.6%                       | <b>Kildare et al. 2007 (5)</b>                           |
|               |                | TaqMan qPCR | Dog, cow, horse and Canadian goose (as groups of composite DNA) (n=41)                                                     | Dog, cow and horse                                                                           | 70.7%                       | Silkie and Nelson 2009 (13)                              |
|               |                | PCR         | As described above                                                                                                         | Pig, sheep, horse and dog                                                                    | 95.6%                       | Ahmed et al. 2009 (2)                                    |
|               |                | TaqMan qPCR | As described above                                                                                                         | Cat, dog, gull and raccoon                                                                   | 38.9%                       | Van De Werfhorst et al. 2011 (7)                         |
|               |                | TaqMan qPCR | As described above                                                                                                         | Chicken, rabbit and dog                                                                      | 91.4%<br>73.3% <sup>d</sup> | Nshimiyimana et al. 2017 (8)                             |
| 16S rRNA gene | BacH           | TaqMan qPCR | Cow, deer, chamois, roe deer, sheep, goat, horse, fox, dog, cat, pig, chicken, turkey, swan, duck and black grouse (n=302) | Cat                                                                                          | 99.7%                       | <b>Reischer et al. 2007 (14)</b>                         |
|               |                | PCR         | As described above                                                                                                         | Sheep, goat and dog                                                                          | 94.1%                       | Ahmed et al. 2009 (2)                                    |
|               |                | TaqMan qPCR | As described above                                                                                                         | Chicken and rabbit                                                                           | 90.0%<br>86.7% <sup>d</sup> | Nshimiyimana et al. 2017 (8)                             |
| 16S rRNA gene | HuBac          | TaqMan qPCR | Cow, pig, horse and dog (n=18)                                                                                             | Cow, pig and dog                                                                             | 67.9%                       | <b>Layton et al. 2006 (15)</b>                           |
|               |                | TaqMan qPCR | As described above                                                                                                         | Cow, horse, dog and cat                                                                      | 61.0%                       | Kildare et al. 2007 (5)                                  |
|               |                | PCR         | As described above                                                                                                         | Cow, pig, sheep, horse, dog and ducks                                                        | 63.2%                       | Ahmed et al. 2009 (2)                                    |
|               |                | TaqMan qPCR | As described above                                                                                                         | Deer, Canadian goose, duck, raccoon, elk, cow, pig, turkey, sheep, chicken, dog, cat and dog | 22.7%                       | Shanks et al. 2010 (3)                                   |
| 16S rRNA      | Human-Bac1     | TaqMan qPCR | Cow and pig                                                                                                                | Cow and pig                                                                                  | 10.0% (10)                  | <b>Okabe et al. 2007 (16)</b>                            |

|                                                                 |                     |             |                                                                 |                                                                                                                         |                             |                                        |
|-----------------------------------------------------------------|---------------------|-------------|-----------------------------------------------------------------|-------------------------------------------------------------------------------------------------------------------------|-----------------------------|----------------------------------------|
| gene/ <i>B. fragilis</i>                                        |                     | PCR         | As described above                                              | Cow, sheep, horse, dog and kangaroo                                                                                     | 78.7%                       | Ahmed et al. 2009 (2)                  |
| 16S rRNA gene                                                   | BachHuman           | TaqMan qPCR | Cow, pig, deer, horse, dog, cat, gull, goose and raccoon (n=54) | Pig, dog and cat                                                                                                        | 81.5% <sup>c</sup>          | <b>Lee et al. 2010</b> (17)            |
| Genomic sequence/ <i>B. thetaiotomicron</i>                     | B. theta            | PCR         | Dog, cow, chicken, turkey, horse, pig and goose (n=241)         | Dog                                                                                                                     | 97.9%                       | <b>Carson et al. 2005</b> (18)         |
|                                                                 |                     | PCR         | As described above                                              | Dog                                                                                                                     | 98.7%                       | Shanks et al. 2010 (3)                 |
| 16S rRNA gene/ <i>B. thetaiotomicron</i>                        | BthetaF2            | TaqMan qPCR | As described above                                              | Pig, chicken, dog and cat                                                                                               | 20.0%                       | <b>Haugland et al. 2010</b> (9)        |
|                                                                 |                     | TaqMan qPCR | As described above                                              | Pronghorn, moose, goose, duck, raccoon, gull, elk, dairy cow, pig, sheep, chicken, dog, cat, sea lion and elephant seal | 31.8%                       | Shanks et al. 2010 (3)                 |
| Genomic sequence/ <i>B. thetaiotomicron</i> $\alpha$ -mannanase | B. theta $\alpha^b$ | TaqMan qPCR | Dog, cow, horse, pig, chicken, turkey and goose (n=160)         | None                                                                                                                    | 100%                        | <b>Yampara-Iquise et al. 2008</b> (19) |
|                                                                 |                     | TaqMan qPCR | As described above                                              | Cat                                                                                                                     | 98.6%<br>93.3% <sup>d</sup> | Nshimiyimana et al. 2017 (8)           |

a. Specificity is calculated as the percentage of negative animal fecal samples.

b. This marked assay was named by Harwood et al. 2014.

c. Animal false positives were reported in the reference publications.

d. The upper percentage represents specificity from individual animals, and the lower percentage represents the specificity from pooled animals.

Table S2. The V4V5 marker candidates, their specificity, sensitivity from the permutation test and the NGS dataset, and their probable source.

| Marker name | Permutated sewage specificity | Permutated sewage sensitivity | NGS V4V5 dataset sewage specificity | NGS V4V5 dataset sewage sensitivity | Probable Source | Sequence                                                                                                                                                                                                                                                                                                                                                                                               |
|-------------|-------------------------------|-------------------------------|-------------------------------------|-------------------------------------|-----------------|--------------------------------------------------------------------------------------------------------------------------------------------------------------------------------------------------------------------------------------------------------------------------------------------------------------------------------------------------------------------------------------------------------|
| V4V5-1      | 1                             | 1                             | 1                                   | 1                                   | Sewer pipe      | ACGGAGGATCCAAGCGTTATCCGGATTATTGGGTTTAAAGGGAGCGTAGGTTGACATATAAGTCAGCTGTGAAAGTTTAC<br>GGCTCAACCGTAAAATTGCAGTTGATACTGTATGCTTGAGTGTACAAGAGGTGGGCGGAATTCGTGGTGTAGCCGGTGAAA<br>TGCTTAGATATCACGAAGAACTCCAATTGCGAAGGCAGCTCACTGGGGTACAACCTGACACTGAGGCTCGAAAGTGTGGGTA<br>TCAAACAGGATTAGATACCCTGGTAGTCCACACAGTAAACGATGAATACTCGCTGTTTGGCATATACAGTAAGCGGCCAAG<br>CGAAAGCATTAAAGTATCCACCTGGGGAGTACGCCGGCAACGGTGAA    |
| V4V5-7      | 1                             | 1                             | 1                                   | 1                                   | Sewer pipe      | ACGGAGGATCCGAGCGTTATCCGGATTATTGGGTTTAAAGGGAGCGTAGGTTGACGTATAAGTCAGCTGTGAAAGTTTAC<br>GGCTCAACCGTAAAATTGCAGTTGATACTGTATGCTTGAGTGTACAAGAGGTGGGCGGAATTCGTGGTGTAGCCGGTGAAA<br>TGCTTAGATATCACGAAGAACTCCAATTGCGAAGGCAGCTCACTGGGGTACAACCTGACACTGAGGCTCGAAAGTGTGGGTA<br>TCAAACAGGATTAGATACCCTGGTAGTCCACACAGTAAACGATGAATACTCGCTGTTTGGCATATACAGTAAGCGGCCAAG<br>CGAAAGCATTAAAGTATCCACCTGGGGAGTACGCCGGCAACGGTGAA    |
| V4V5-13     | 1                             | 0.96                          | 1                                   | 0.96                                | Sewer pipe      | ACGGAGGATCCGAGCGTTATCCGGATTATTGGGTTTAAAGGGAGCGTAGGTTGACATATAAGTCAGCTGTGAAAGTTTAC<br>GGCTCAACCGTAAAATTGCAGTTGATACTGTATGCTTGAGTGTACAAGAGGTGGGCGGAATTCGTGGTGTAGCCGGTGAAA<br>TGCTTAGATATCACGAAGAACTCCAATTGCGAAGGCAGCTCACTGGGGTACAACCTGACACTGAGGCTCGAAAGTGTGGGTA<br>TCAAACAGGATTAGATACCCTGGTAGTCCACACAGTAAACGATGAATACTCGCTGTTTGGCATATACAGTAAGCGGCCAAG<br>CGAAAGCATTAAAGTATCCACCTGGGGAGTACGCCGGCAACGGTGAA    |
| V4V5-22     | 1                             | 0.95                          | 1                                   | 0.95                                | Human feces     | ACGGAGGATCCGAGCGTTATCCGGATTATTGGGTTTAAAGGGAGCGTAGGCGGTTAGTCAAGCTGTGAAAGTTTGG<br>GGCTCAACCGTAAAATTGCAGTTGATACTGTATGCTTGAGTGTACAAGAGGTGGGCGGAATTCGTGGTGTAGCCGGTGAAA<br>AATGCTTAGATATCACGAAGAACTCCAATTGCGAAGGCAGCTCACTGGGGTACAACCTGACACTGAGGCTCGAAAGTGTGGGTA<br>TCAAACAGGATTAGATACCCTGGTAGTCCACACAGTAAACGATGAATACTCGCTGTTTGGCATATACAGTAAGCGGCCAAG<br>CGAAAGCATTAAAGTATCCACCTGGGGAGTACGCCGGCAACGGTGAA      |
| V4V5-25     | 1                             | 0.91                          | 1                                   | 0.91                                | Sewer pipe      | ACGGAGGATCCGAGCGTTATCCGGATTATTGGGTTTAAAGGGAGCGTAGGCGGATGTTTAAAGTCAGTTGTGAAAGTTTAA<br>GGCTCAACCGTAAAATTGCAGTTGATACTGGATATCTTGAGTACATTGAATGTGGGCGGAATTCGTGGTGTAGCCGGTGAAA<br>TGCTTAGATATCACGAAGAACTCCAATTGCGAAGGCAGCTCACAGTAATGTAACCTGACCGCTGATGCTCGAAAGTGTGGGTA<br>TCAAACAGGATTAGATACCCTGGTAGTCCACACAGTAAACGATGAATACTCGCTGTTTGGCATATACAGTAAGCGGCCAAG<br>CGAAAGCATTAAAGTATCCACCTGGGGAGTACGCCGGCAACGGTGAA |
| V4V5-32     | 1                             | 0.94                          | 1                                   | 0.94                                | Human feces     | ACGGAGGATCCGAGCGTTATCCGGATTATTGGGTTTAAAGGGAGCGTAGGCGGTTAGTCAAGCTGTGAAAGTTTGG<br>GGCTCAACCGTAAAATTGCAGTTGATACTGGTACCTTGAGTGCAGCATAGGTAGGCGGAATTCGTGGTGTAGCCGGTGAAA<br>TGCTTAGATATCACGAAGAACTCCAATTGCGAAGGCAGCTCACTGGGACTGTAACCTGACGCTGATGCTCGAAAGTGTGGGTA<br>TCAAACAGGATTAGATACCCTGGTAGTCCACACAGTAAACGATGAATACTCGCTGTTTGGCATATACAGTAAGCGGCCAAG<br>CGAAAGCATTAAAGTATCCACCTGGGGAGTACGCCGGCAACGGTGAA       |
| V4V5-37     | 1                             | 0.93                          | 1                                   | 0.93                                | Human feces     | ACGGAGGATCCGAGCGTTATCCGGATTATTGGGTTTAAAGGGAGCGTAGGCGGATTTAAGTCAGTTGTGAAAGTTTGG<br>GGCTCAACCGTAAAATTGCAGTTGATACTGGTAGTCTTGAGTGCAGCAGAGGTAGGCGGAATTCGTGGTGTAGCCGGTGAAA<br>ATGCTTAGATATCACGAAGAACTCCAATTGCGAAGGCAGCTCACTGGACTGTAACCTGACCGCTGATGCTCGAAAGTGTGGGTA<br>TCAAACAGGATTAGATACCCTGGTAGTCCACACAGTAAACGATGAATACTCGCTGTTTGGCATATACAGTAAGCGGCCAAG<br>CGAAAGCATTAAAGTATCCACCTGGGGAGTACGCCGGCAACGGTGAA   |

Table S3. The V6 marker candidates, their specificity, sensitivity from the permutation test and the NGS dataset, and their probable source.

| Marker name | Permutated sewage specificity | Permutated sewage sensitivity | NGS V6 dataset sewage specificity | NGS V6 dataset sewage sensitivity | Probable Source | Sequence                                                    |
|-------------|-------------------------------|-------------------------------|-----------------------------------|-----------------------------------|-----------------|-------------------------------------------------------------|
| V6-21       | 1                             | 1                             | 1                                 | 1                                 | Sewer pipe      | CGGGCTTGAATTGCAGAGGAATATAGTTGAAAGATTATGGCCGCAAGGTCTCTGTGA   |
| V6-23       | 1                             | 1                             | 1                                 | 1                                 | Human feces     | CGGGCTTAAATTGCAAAATGAATTATGGGGAAACCCATAGGCCGTAAGGCATTTGTGA  |
| V6-24       | 1                             | 1                             | 1                                 | 1                                 | Sewer pipe      | CAGGCTTAAATTGCAGATGAATATAGTGGAAACATTATAGCCTTCGGGCATCTGTGA   |
| V6-26       | 1                             | 1                             | 1                                 | 1                                 | Sewer pipe      | CGGGCTTAAATTGCACAGGAATAATTTGGAAACAGATTAGTCTTCGGACCTGTGTGA   |
| V6-36       | 1                             | 1                             | 1                                 | 1                                 | Sewer pipe      | CGGGCTTGAATTGCTAATGAATATATATGAAAGTATATAGCCGCAAGGCATTAGTGA   |
| V6-38       | 1                             | 1                             | 1                                 | 1                                 | Sewer pipe      | CGGGCTTGAATTGCTAATGAATGGAGTAGAGATATTCAGCCGCAAGGCATTAGTGA    |
| V6-44       | 1                             | 1                             | 1                                 | 1                                 | Sewer pipe      | CAGGCTTAAATTGCAGATGAATATAGTAGAAATATTATAGCCTTCGGGCATCTGTGA   |
| V6-17       | 1                             | 0.95                          | 1                                 | 1                                 | Sewer pipe      | CGGGCTTAAATTGCAAAATGAATATAGTGGAAACATTATAGCCAGCAATGGCATTGTGA |
| V6-32       | 1                             | 0.95                          | 1                                 | 1                                 | Sewer pipe      | CAGGCTTAAATTGCAGATGAATATAGTGGAAACATTATAGTCTTCGGACATCTGTGA   |
| V6-34       | 1                             | 0.95                          | 1                                 | 1                                 | Sewer pipe      | CGGGCTTAAATTGCAACTGAATAGCTGAGAGATCAGTTAGCTAGCAATAGCAGTTGTGA |
| V6-37       | 1                             | 0.95                          | 1                                 | 1                                 | Sewer pipe      | CGGGCTTGAATTGCAGAGGAATATAGTTGAAAGATTATAGCCGCAAGGCCTCTGTGA   |
| V6-40       | 1                             | 0.925                         | 1                                 | 1                                 | Sewer pipe      | CAGGCTTAAATTGCAGATGAATATGTGGGAAACCATATAGCCAGCAATGGCATCTGTGA |
| V6-42       | 1                             | 0.95                          | 1                                 | 1                                 | Sewer pipe      | CAGGCTTAAATTGCAGATGAATATAGTGGAAACATTATAGCCAGCAATGGCATCTGTGA |
| V6-45       | 1                             | 0.9                           | 1                                 | 1                                 | Sewer pipe      | CAGGCTTAAATTGCAGATGAATATAGTAGAAATATTATAGTCTTCGGACATCTGTGA   |
| V6-50       | 1                             | 0.975                         | 1                                 | 1                                 | Sewer pipe      | CGGGCTTGAATTGCAGAGGAATATAGTCGAAAGATTATAGCCGCAAGGTCTCTGTGA   |
| V6-52       | 1                             | 0.925                         | 1                                 | 0.875                             | Human feces     | CGGGCTTAAATTGCAAAATGAATATGCCGAAACGGCATAGCCGCAAGGCATTTGTGA   |
| V6-55       | 1                             | 0.95                          | 1                                 | 0.95                              | Sewer pipe      | CAGGCTTAAATTGCAGATGAATATAGTGGAAACATTATAGCCTTTATGGCATCTGTGA  |
| V6-68       | 1                             | 0.9                           | 1                                 | 1                                 | Sewer pipe      | CGGGCTTGAATTGCAGAGGAACATAGTTGAAAGATTATCGCCGCAAGGTCTCTGTGA   |
| V6-73       | 1                             | 0.925                         | 1                                 | 1                                 | Sewer pipe      | CGGGCTTAAATTGCAACTGAATAATTGAGAGATCAGTTAGCTAGCAATAGCAGTTGTGA |
| V6-79       | 1                             | 0.925                         | 1                                 | 1                                 | Sewer pipe      | CGGGCTTAAATTGCAACTGAATAACTTAGAGATGAGTTAGCTAGCAATAGCAGTTGTGA |
| V6-96       | 1                             | 0.9                           | 1                                 | 1                                 | Human feces     | CGGGTTTGAACGCATTCGGACCGGAGTGAAACACTTCTTAGCAATAGCCGTTTGGC    |

Table S4. Amplicon sequences of the BacV4V5-1 and BacV6-21 assays.

| Assay name | Amplicon sequence                                                                                                                                                                       | Examples of reference clone sequences<br>(GenBank Access. No.) |
|------------|-----------------------------------------------------------------------------------------------------------------------------------------------------------------------------------------|----------------------------------------------------------------|
| BacV4V5-1  | AAGGGAGCGTAGGTTGACATATAAGTCAGCTGTGAAAGTTTACGGCTCAACC<br>GTGAAATTGCAGTTGATACTGTATGTCTTGAGTGTACAAGAGGTGGGCGG                                                                              | MH515903, MH515911, MH515713                                   |
| BacV6-21   | GCTTGAATTGCAGAGGAATATAGTTGAAAGATTATGGCCGCAAGGTCTCTGT<br>GAAGGTGCTGCATGGTTGTCGTCAGCTCGTGCCGTGAGGTGTCGGCTTAAG<br>TGCCATAACGAGCGCAACCCTTATCATTAGTTACTAACAGGTCATGCTGAGG<br>ACTCTAGTGAGACTGC | MH515733, MH515713                                             |

Table S5. Slopes, y intercepts,  $R^2$  and efficiencies of the four qPCR assays used in this study.

| Assay name    | Slope  | Y intercept | $R^2$ | Efficiency (%) |
|---------------|--------|-------------|-------|----------------|
| BacV4V5-1     | -3.364 | 38.056      | 0.998 | 98.3235        |
| BacV6-21      | -3.399 | 38.934      | 0.997 | 96.869         |
| HB            | -3.372 | 37.468      | 0.999 | 98.026         |
| HF183/BacR287 | -3.514 | 38.565      | 0.999 | 92.591         |

## Reference

1. Bernhard AE, Field KG. 2000. A PCR assay to discriminate human and ruminant feces on the basis of host differences in *Bacteroides-Prevotella* genes encoding 16S rRNA. *Appl Environ Microbiol* 66:4571–4574.
2. Ahmed W, Goonetilleke A, Powell D, Gardner T. 2009. Evaluation of multiple sewage-associated *Bacteroides* PCR markers for sewage pollution tracking. *Water Res* 43:4872–4877.
3. Shanks OC, White K, Kelty CA, Sivaganesan M, Blannon J, Meckes M, Varma M, Haugland RA. 2010. Performance of PCR-based assays targeting *Bacteroidales* genetic markers of human fecal pollution in sewage and fecal samples. *Environ Sci Technol* 44:6281–6288.
4. Seurinck S, Defoirdt T, Verstraete W, Siciliano SD. 2005. Detection and quantification of the human-specific HF183 *Bacteroides* 16S rRNA genetic marker with real-time PCR for assessment of human faecal pollution in freshwater. *Environ Microbiol* 7:249–259.
5. Kildare BJ, Leutenegger CM, McSwain BS, Bambic DG, Rajal VB, Wuertz S. 2007. 16S rRNA-based assays for quantitative detection of universal, human-, cow-, and dog-specific fecal *Bacteroidales*: A Bayesian approach. *Water Res* 41:3701–3715.
6. Ahmed W, Yusuf R, Hasan I, Goonetilleke A, Gardner T. 2010. Quantitative PCR assay of sewage-associated *Bacteroides* markers to assess sewage pollution in an urban lake in Dhaka, Bangladesh. *Can J Microbiol* 56:838–845.
7. Van De Werfhorst LC, Sercu B, Holden PA. 2011. Comparison of the host specificities of two *Bacteroidales* quantitative PCR assays used for tracking human fecal contamination. *Appl Environ Microbiol* 77:6258–6260.
8. Nshimiyimana JP, Cruz MC, Thompson RJ, Wuertz S. 2017. *Bacteroidales* markers for microbial source tracking in Southeast Asia. *Water Res* 118:239–248.
9. Haugland RA, Varma M, Sivaganesan M, Kelty C, Peed L, Shanks OC. 2010. Evaluation of genetic markers from the 16S rRNA gene V2 region for use in quantitative detection of selected *Bacteroidales* species and human fecal waste by qPCR. *Syst Appl Microbiol* 33:348–357.
10. Green HC, Haugland RA, Varma M, Millen HT, Borchardt MA, Field KG, Walters WA, Knight R, Sivaganesan M, Kelty CA, Shanks OC. 2014. Improved HF183 quantitative real-time PCR assay for characterization of human fecal pollution in ambient surface water samples. *Appl Environ Microbiol* 80:3086–3094.
11. Feng S, Bootsma M, McLellan SL. 2018. Human-Associated *Lachnospiraceae* Genetic Markers Improve Detection of Fecal Pollution Sources in Urban Waters. *Appl Environ Microbiol* 84:1–14.
12. Templar HA, Dila DK, Bootsma MJ, Corsi SR, McLellan SL. 2016. Quantification of human-associated fecal indicators reveal sewage from urban watersheds as a source of pollution to Lake Michigan. *Water Res* 100:556–567.
13. Silkie SS, Nelson KL. 2009. Concentrations of host-specific and generic fecal markers measured by quantitative PCR in raw sewage and fresh animal feces. *Water Res* 43:4860–4871.
14. Reischer GH, Kasper DC, Steinborn R, Farnleitner AH, Mach RL. 2007. A quantitative real-time PCR assay for the highly sensitive and specific detection of human faecal influence in spring water from a large alpine catchment area. *Lett Appl Microbiol* 44:351–356.
15. Layton A, McKay L, Williams D, Garrett V, Gentry R, Saylor G. 2006. Development of *Bacteroides* 16S rRNA gene taqman-based real-time PCR assays for estimation of total, human, and bovine fecal pollution in water. *Appl Environ Microbiol* 72:4214–4224.
16. Okabe S, Okayama N, Savichtcheva O, Ito T. 2007. Quantification of host-specific *Bacteroides-Prevotella* 16S rRNA genetic markers for assessment of fecal pollution in freshwater. *Appl Microbiol Biotechnol* 74:890–901.
17. Lee DY, Weir SC, Lee H, Trevors JT. 2010. Quantitative identification of fecal water pollution sources by TaqMan real-time PCR assays using *Bacteroidales* 16S rRNA genetic markers. *Appl Microbiol Biotechnol* 88:1373–1383.

18. Carson CA, Christiansen JM, Benson VW, Baffaut C, Jerri V, Broz RR, Kurtz WB, Rogers WM, Fales WH, Yampara-iqoise H, Davis J V. 2005. Specificity of a *Bacteroides thetaiotaomicron* Marker for Human Feces. *Appl Environ Microbiol* 71:4945–4949.
19. Yampara-iqoise H, Zheng G, Jones JE, Carson CA. 2008. Use of a *Bacteroides thetaiotaomicron*-specific  $\alpha$ -1-6, mannanase quantitative PCR to detect human faecal pollution in water. *J Appl Microbiol* 105:1686–1693.
